# Supplementary material for: Acquisition Risk Factors of the SCCmec IX-Methicillin-Resistant Staphylococcus aureus in Swine Production Personnel in Chiang Mai and Lamphun Provinces, Thailand
Source: MDPI journal article supplement (doi:10.3390/antibiotics9100651), 2020-09-29
Supplement: s1 [file s1]

# Acquisition Risk Factors of the SCC<sub>mec</sub> IX- Methicillin-resistant *Staphylococcus aureus* in Swine Production Personnel in Chiang Mai and Lamphun Provinces, Thailand

Peerapat Rongsanam <sup>1</sup>, Terdsak Yano <sup>2</sup>, Wuttipong Yokart <sup>3</sup>, Panuwat Yamsakul <sup>2</sup>, Suweera Suthammeng <sup>1</sup>, Ratchadaporn Udpuan <sup>1</sup>, Duangporn Pichpol <sup>4</sup>, Decha Tamdee <sup>5</sup> and Usanee Anukool <sup>1,6,\*</sup>

<sup>1</sup> Division of Clinical Microbiology, Department of Medical Technology, Faculty of Associated Medical Sciences, Chiang Mai University, Chiang Mai, 50200, Thailand

<sup>2</sup> Department of Food Animal Clinic, Faculty of Veterinary Medicine, Chiang Mai University, Chiang Mai, 50100, Thailand

<sup>3</sup> Division of Clinical Microscopy, Department of Medical Technology, Faculty of Associated Medical Sciences, Chiang Mai University, Chiang Mai, 50200, Thailand

<sup>4</sup> Department of Veterinary Biosciences and Veterinary Public Health, Faculty of Veterinary Medicine, Chiang Mai University, Chiang Mai, 50100, Thailand

<sup>5</sup> Department of Public Health Nursing, Faculty of Nursing, Chiang Mai University, Chiang Mai, 50200, Thailand

<sup>6</sup> Infectious Diseases Research Unit (IDRU), Faculty of Associated Medical Sciences, Chiang Mai University, Muang District, Chiang Mai, 50200, Thailand

\* Correspondence: usanee.anukool@cmu.ac.th; Tel.: +66-53-93-5068 ext. 15, +66-86-654-4565; Fax: +66-53-93-6042

## Supplementary Data

**Table S1.** The sampling sites, locations and sample code of 202 swine production personnel.

| Sampling sites* | Locations               | No. of SPP (SPP code)      |
|-----------------|-------------------------|----------------------------|
| A               | Muang district, Lamphun | 4 (A1, A2, A3, A4)         |
| B               | Muang district, Lamphun | 4 (B1, B2, B3, B4)         |
| C               | Muang district, Lamphun | 2 (C1, C2)                 |
| D               | Muang district, Lamphun | 5 (D1, D2, D3, D4, D5)     |
| E               | Muang district, Lamphun | 3 (E1, E2, E3)             |
| F               | Muang district, Lamphun | 1 (F1)                     |
| G               | Muang district, Lamphun | 1 (G1)                     |
| H               | Muang district, Lamphun | 1 (H1)                     |
| I               | Muang district, Lamphun | 2 (I1, I2)                 |
| J               | Muang district, Lamphun | 2 (J1, J2)                 |
| K               | Muang district, Lamphun | 1 (K1)                     |
| L               | Muang district, Lamphun | 2 (L1, L2)                 |
| M               | Muang district, Lamphun | 1 (M1)                     |
| N               | Muang district, Lamphun | 1 (N1)                     |
| O               | Muang district, Lamphun | 1 (O1)                     |
| P               | Muang district, Lamphun | 6 (P1, P2, P3, P4, P5, P6) |

|                 |                                 |                                                                                                                                                                                                                                                     |
|-----------------|---------------------------------|-----------------------------------------------------------------------------------------------------------------------------------------------------------------------------------------------------------------------------------------------------|
| Q               | Muang district, Lamphun         | 1 (Q1)                                                                                                                                                                                                                                              |
| R               | Muang district, Lamphun         | 1 (R1)                                                                                                                                                                                                                                              |
| S               | Muang district, Lamphun         | 1 (S1)                                                                                                                                                                                                                                              |
| T               | Muang district, Lamphun         | 7 (T1, T2, T3, T4, T5, T6, T7)                                                                                                                                                                                                                      |
| U               | Mae Rim district, Chiang Mai    | 6 (U1, U2, U3, U4, U5, U6)                                                                                                                                                                                                                          |
| V               | Mae Rim district, Chiang Mai    | 2 (V1, V2)                                                                                                                                                                                                                                          |
| W               | San Sai district, Chiang Mai    | 46<br>(W1, W2, W3, W4, W5, W6, W7, W8, W9, W10, W11, W12, W13, W14, W15, W16, W17, W18, W19, W20, W21, W22, W23, W24, W25, W26, W27, W28, W29, W30, W31, W32, W33, W34, W35, W36, W37, W38, W39, W40, W41, W42, W43, W44, W45, W46)                 |
| X               | Muang district, Lamphun         | 14<br>(X1, X2, X3, X4, X5, X6, X7, X8, X9, X10, X11, X12, X13, X14)                                                                                                                                                                                 |
| Y               | Muang district, Lamphun         | 4 (Y1, Y2, Y3, Y4)                                                                                                                                                                                                                                  |
| Z               | Pa Sang district, Lamphun       | 2 (Z1, Z2)                                                                                                                                                                                                                                          |
| AA              | Chom Thong district, Chiang Mai | 41<br>(AA1, AA2, AA3, AA4, AA5, AA6, AA7, AA8, AA9, AA10, AA11, AA12, AA13, AA14, AA15, AA16, AA17, AA18, AA19, AA20, AA21, AA22, AA23, AA24, AA25, AA26, AA27, AA28, AA29, AA30, AA31, AA32, AA33, AA34, AA35, AA36, AA37, AA38, AA39, AA40, AA41) |
| AB              | Muang district, Lamphun         | 4 (AB1, AB2, AB3, AB4)                                                                                                                                                                                                                              |
| AC              | Chom Thong district, Chiang Mai | 9<br>(AC1, AC2, AC3, AC4, AC5, AC6, AC7, AC8, AC9)                                                                                                                                                                                                  |
| AD              | Muang district, Lamphun         | 2 (AD1, AD2)                                                                                                                                                                                                                                        |
| AE              | Muang district, Lamphun         | 1 (AE1)                                                                                                                                                                                                                                             |
| AF <sup>†</sup> | Muang district, Chiang Mai      | 21<br>(AF1, AF2, AF3, AF4, AF5, AF6, AF7, AF8, AF9, AF10, AF11, AF12, AF13, AF14, AF15, AF16, AF17, AF18, AF19, AF20, AF21)                                                                                                                         |
| AG <sup>‡</sup> | Muang district, Lamphun         | 1 (AG1)                                                                                                                                                                                                                                             |
| Total           |                                 | 202                                                                                                                                                                                                                                                 |

No., Number; SPP, swine production personnel

- A-AE: swine farms A-AE

<sup>†</sup> AF: the group of veterinarians and veterinary students who not routinely work at particular swine farm

<sup>‡</sup> AG: the group of workers who was working at the slaughterhouse

**Table S2.** The accumulated resistance of 59 MRSA isolates from SPP.

| No. of antimicrobial classes | Accumulated Resistance |            |
|------------------------------|------------------------|------------|
|                              | No. of MRSA isolates   | Percentage |
| 10                           | 1                      | 1.69       |
| 9                            | 8                      | 13.56      |
| 8                            | 26                     | 44.07      |
| 7                            | 43                     | 72.88      |
| 6                            | 48                     | 81.36      |
| 5                            | 55                     | 93.22      |
| 4                            | 56                     | 94.92      |
| 3                            | 59                     | 100.00     |

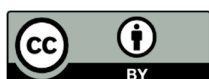

© 2020 by the authors. Licensee MDPI, Basel, Switzerland. This article is an open access article distributed under the terms and conditions of the Creative Commons Attribution (CC BY) license (<http://creativecommons.org/licenses/by/4.0/>).
